1           **A systematic review of non-clinician trauma-based**  
2           **interventions for school-age children and young people**

3

4   Short title: Review of non-clinical trauma-based interventions for school children.

5

6   Flo Avery<sup>1</sup>, Natasha Kennedy<sup>1</sup>, Michaela James<sup>1</sup>, Hope Jones<sup>1</sup>, Rebekah Amos<sup>2</sup>, Mark  
7   Bellis<sup>3</sup>, Karen Hughes<sup>2,4</sup>, Sinead Brophy<sup>1\*</sup>

8

9   <sup>1</sup> National Centre for Population Health and Wellbeing, School of Medicine, Swansea  
10   University, Swansea, United Kingdom.

11   <sup>2</sup> School of Human Sciences, Bangor University, Wrexham, United Kingdom

12   <sup>3</sup> Faculty of Health, Liverpool John Moores University, Liverpool, United Kingdom

13   <sup>4</sup> Policy and International Health Directorate, World Health Organization Collaborating

14   Centre on Investment for Health and Well-Being, Public Health Wales, Wrexham, United

15   Kingdom

16

17   \* Corresponding author

18   Email:s.brophy@swansea.ac.uk

19  
20  
21  
22  
23  
24  
25  
26  
27  
28  
29  
30  
31  
32  
33  
34  
35  
36  
37  
38  
39  
40  
41  
42  
43

## Abstract

Exposure to adverse childhood experiences (ACEs) is increasingly recognised as a risk factor for health problems in later life. Awareness of ACEs and associated trauma is increasing in schools and educational settings, as well as demand for supportive services to deal with needs. However, there is a lack of clear evidence for effective interventions which can be delivered by non-clinicians (e.g., the school staff themselves). For this review, we conducted a search across five electronic databases for studies published since January 2013. These studies assessed the efficacy of non-clinician delivered interventions for supporting trauma recovery or improvements in mental health in school age youth (4-18 years) who have experienced ACEs. Out of the 4097 studies identified through the search, 326 were retrieved for full text screening and 25 were included in the final review. There was considerable heterogeneity in study design, outcome measures and the intervention being studied. The majority of studies were assessed to be of weak quality due to convenience sampling of participants and potential bias, indicating there is a lack of high quality research evidence to inform non-clinician delivered trauma-informed interventions for improving mental health outcomes in school-age young people. Cognitive Behavioural Therapy (CBT)-based approaches are tentatively suggested as a suitable target for future rigorous evaluations of interventions addressing ACE-related trauma recovery and mental health improvement in school-age young people.

44  
45  
46  
47  
48  
49  
50  
51  
52  
53  
54  
55  
56  
57  
58  
59  
60  
61  
62  
63  
64  
65  
66  
67  
68

## Introduction

Adverse Childhood Experiences (ACEs) are potentially traumatic experiences such as child abuse or neglect, or household dysfunction (such as drug and alcohol abuse or domestic violence within the family home), occurring before the age of 18. Young people exposed to ACEs face an elevated risk of unhealthy behaviours and long term physical and mental health problems (1,2). This correlation is particularly pronounced among those who have experienced four or more ACEs (3). While not everyone who has ACEs necessarily experiences a traumatic event (4), the occurrence of multiple ACEs closely predicts the development of trauma symptoms (5).

Promoting ACE awareness and implementing trauma-informed services are increasingly recommended as vital supportive measures, both in healthcare (6) and educational (7) settings. In response, schools and policy-makers are advocating for and embedding trauma-informed approaches (8,9). Schools and educational settings are recognised as crucial settings for providing support to young people affected by potentially traumatic experiences (10).

Numerous reviews have examined the evidence for different systemic approaches and therapeutic interventions for supporting young people with trauma (11–13). Many of the interventions in these reviews are clinical in nature, delivered by psychologists, therapists, or medical and allied health professionals. However, with ACEs being relatively common, for example between 1%-38% (3) reported to experience 4 or more ACE, a more population approach is needed. Yet, there is a notable gap in evidence for interventions suitable for non-clinician delivery (14). This is a barrier for many schools with limited access to clinicians and without mental health professionals on staff. Consequently, teachers and teaching assistants are

69 often tasked with providing mental health support to young people (15,16). While Franklin et  
70 al. (17) have suggested that interventions delivered by teachers and non-clinicians can be  
71 beneficial for young people's mental health, they highlight the lack of empirical evidence  
72 regarding their effectiveness.

73

74 This review, therefore, aims to address the question of what evidence base exists for  
75 interventions supporting trauma, specifically those suitable for non-clinician delivery. The  
76 objective is to synthesise evidence for interventions appropriate for professionals such as  
77 teachers and teaching assistants, acknowledging their increasingly critical role in providing  
78 mental health support to young people affected by potentially traumatic experiences.

79

80

81

82

83

## Methods

84

85 This systematic review was conducted in accordance with the Preferred Reporting Items for  
86 Systematic Reviews and Meta-Analysis (PRISMA) guidelines (18). The protocol for the  
87 review was registered in the PROSPERO International Prospective Register of Systematic  
88 Reviews in June 2023 (ID: CRD42023417286).

89

### 90 Review Design

91

92 We conducted a systematic review of quantitative and qualitative evidence to evaluate the  
93 effectiveness of trauma-informed interventions suitable for non-clinician delivery. The study

94 findings were summarised through a narrative synthesis. Heterogeneity in study designs and  
95 outcome measures precluded the ability to conduct a meta-analysis. One researcher (FA)  
96 extracted study data from full text papers, and this was reviewed by a second researcher (RA).  
97 Any inaccuracies were presented to and resolved by a third independent researcher

98

## 99 **Search Strategy**

100

101 Five electronic databases – Web of Science, Embase, Science Direct, Applied Social Sciences  
102 Index (ASSIA) and EBSCO (including CINAHL Plus with Full Text, MEDLINE, APA  
103 PsycArticles, APA PsycInfo, Teacher Reference Center, and Education Research Complete) –  
104 were searched to identify relevant studies published in English. The literature search was  
105 conducted in April 2023. Search terms included: Trauma\* OR "Post-Traumatic Stress" OR  
106 PTSD and Intervention\* OR Treatment\* and children OR youth OR young OR adolescen\* and  
107 education OR school OR teach\* OR play. Detailed search terms can be viewed in Appendix 1.

108

## 109 **Eligibility**

110

### 111 ***Inclusion Criteria***

112

113 Articles were included if they met the following criteria: (1) published in English in the last 10  
114 years (e.g since January 2013); (2) reported on any supportive or therapeutic intervention with  
115 applicability to trauma recovery, or recovery from the impact of ACEs; (3) intervention was  
116 suitable for non-clinician delivery e.g. teacher, teaching assistant or similar; (4) participants  
117 were aged 4-18 years (school aged) with any experience of or exposure to ACEs; (5)  
118 intervention took place in a school, educational setting, community setting, residential or care

119 settings; and (6) included a validated self-reported mental health outcome relating to trauma or  
120 adversity such as post-traumatic stress disorder (PTSD) symptoms as an outcome measure.  
121 Both randomised and non-randomised studies were included. Language of publication was  
122 restricted owing to constraints of the research team's capacity. Restrictions were made by  
123 publication date to maximise the relevance of studies.

124

### 125 ***Exclusion Criteria***

126

127 Articles were excluded if they met the following criteria: 1) All participants were over 18 or  
128 under 4 years; 2) interventions were assessed indirectly through a teacher or professional  
129 assessment of young people; 3) interventions were based on disasters such as earthquakes,  
130 floods or experiences of war; 4) interventions were delivered by clinicians; 5) interventions  
131 were behavioural rather than supportive, such as violence prevention or sex education  
132 programmes; 6) the research study had implemented a case study designs; and 7) the research  
133 had been conducted in a hospital or in-patient healthcare setting.

134

### 135 **Study Selection**

136

137 The search yielded 7147 results, which were imported into Covidence for title and abstract  
138 screening. After removing 3050 duplicates, the remaining titles and abstracts (4097) were  
139 screened against the selection criteria by the primary author, FA. Additionally, all titles and  
140 abstracts underwent independent screening by a second reviewer. Reviewers achieved a 96%  
141 agreement rate, and any disagreements were resolved through discussions among authors (FA,  
142 SB, NK, RA, HJ, MJ), resulting in a majority consensus reached by agreement between at least  
143 three authors. As a result, 3770 studies were excluded as irrelevant. FA retrieved and

144 independently screened all full-text articles (326), which were also independently screened by  
145 a second reviewer. Reviewers reached an 88% agreement rate, resolving disagreements through  
146 discussion amongst authors (FA, SB, NK, HJ, MJ), with a majority vote from at least three  
147 authors. Figure 1 shows details of the selection process, including reasons for excluding articles  
148 at different stages. Twenty-four articles met the inclusion criteria. Data extraction from these  
149 articles was undertaken by one reviewer (FA) and cross-checked by a second reviewer (RA or  
150 MJ). Data extracted included demographic data regarding the papers such as country of study,  
151 target population, year of publication, and descriptive information about the intervention such  
152 type of intervention, length of followup, measures of effect, barriers to implementation. The  
153 outcomes differed in each study and so a descriptive extraction of the data in each study was  
154 recorded. The study quality was assessed using validated tools (see below). Furthermore,  
155 reference lists from these twenty four studies were manually searched by FA, resulting in the  
156 identification of one additional paper. This was uploaded to Covidence and voted on by other  
157 authors for inclusion. The paper was voted eligible for inclusion and so a total of twenty-five  
158 articles met the inclusion criteria and are included in this review.

159

## 160 **Quality Assessment**

161

162 Effective Public Health Practice Project (EPHPP)'s Quality Assessment Tool for Quantitative  
163 Studies was used to assess the quality of quantitative research including randomised control  
164 trials (RCTs), non-randomised experimental studies and cohort design studies (19). This tool  
165 assesses potential selection bias, the appropriateness of study design, confounding, blinding,  
166 data collection tools, participant dropouts, intervention integrity and statistical analyses.  
167 Quality ratings are scored on a scale of 1-3, where 1 indicates strong quality, 2 indicates  
168 moderate quality, and 3 indicates weak quality. Overall ratings are classified as a) weak (when

169 2 or more components rated as weak), b) moderate (when only one component rated as weak),  
170 or c) strong.

171  
172 Qualitative studies were assessed using the Critical Appraisal Skills Programme (CASP)  
173 Qualitative Studies Checklist (20). This checklist assesses three broad areas, such as a) the  
174 validity of the study, b) the study findings and c) the utility of the research locally. Within each  
175 of these broad domains are a set of questions designed to provide an overview of the study  
176 quality in each domain (20). Mixed methods research was assessed using both checklists. No  
177 studies were excluded based on the results of the quality assessment. Quality assessment was  
178 conducted by one reviewer (FA) and checked by a second reviewer (RA and MJ).  
179 Disagreements were resolved through discussion amongst authors.

180

## 181 **Results**

182

### 183 **Overview of studies**

184

185 Characteristics of the twenty five studies included in the current review are summarised in  
186 Table 1. Six studies were randomised control trials (21–26), fifteen used a cohort design (pre-  
187 test and post-test) (26–38), three used qualitative methods (39–41) and one used mixed  
188 methods (cohort design and qualitative methods) (42). The average sample size was 119  
189 participants, ranging from 15 participants (37) to 565 participants (43). Of the included studies,  
190 14 (56%) had a sample size above 50 (21,27,28,30,32,34–36,39,43–46). As anticipated, there  
191 was a high level of methodological diversity in terms of study design, populations (e.g. refugee,  
192 LGBTQ, youth offender, middle east, USA, Europe, Asia) and measures used, and therefore  
193 meta-analysis was not conducted.



194

195 The studies in this review either recruited the study population based on likely exposure to  
196 trauma, measured exposure to traumatic events, or measured PTSD symptoms (or a mix of  
197 these). Seven studies directly measured exposure to traumatic events  
198 (21,22,25,30,35,40,44,47). Thirteen studies directly measured PTSD symptoms  
199 (22,24,29,34,40,42), and of these, seven used PTSD score as selection criteria (29,30,33–  
200 35,37,43).

201

202 Ten studies assessed interventions which were delivered in the school setting (24,25,28–  
203 30,33,35,36,38,43). Three studies observed interventions delivered online (22,34,37). Eight  
204 studies looked at interventions delivered in a community setting (such as a church or charity  
205 site) (21,23,26,27,31,39,44,46), two were interventions delivered on university campuses  
206 (40,41), and one was an intervention delivered in a residential setting (32). One study evaluated  
207 the intervention across different settings, including a school and residential setting (42).

208

### 209 ***Quality of included studies***

210

211 The quality assessment scores of included studies are shown in Tables 2-4. The methodological  
212 quality of included studies was weak overall. Using the EPHPP tool for quantitative studies,  
213 two studies were categorised as strong, seven studies as moderate, and the rest as weak. The  
214 majority of studies rated as weak relied on convenience samples of participants and did not  
215 adequately describe methodological information, such as potential confounding and blinding.  
216 Overall, qualitative studies were not considered strong, primarily because they lacked  
217 consistent discussions on how the relationship between researcher and participants was  
218 managed, including consideration of power dynamics and ethical issues.

219

220 The nine studies rated moderate or strong on quality included a range of interventions. Two  
221 studies looked at CBT-based groups in refugee populations (29,43). Other studies evaluated  
222 interventions focused on expressive writing (32), mindfulness (33), game-based mindfulness  
223 (37), trauma-focused CBT (delivered by lay counsellors) (44), a targeted group for sexual and  
224 gender minority adolescents (SGMA) (24), and a psychoeducational programme about  
225 posttraumatic growth (25).

226

### 227 ***CBT-based groups***

228

229 Seven studies evaluated CBT-based groups, although four were of weak quality. Four studies  
230 investigated Teaching Recovery Techniques (TRT), a five week programme based on trauma-  
231 focused cognitive behavioural therapy (TF-CBT) designed for children in low resource  
232 settings, making it suitable for delivery by non-clinicians. The program was developed by the  
233 Children and War Foundation (48). El-Khani et al. (43) evaluated TRT in an RCT with Syrian  
234 refugee children aged 9-12 and their families in Lebanon, comparing it with a waitlist control  
235 group and a TRT + parenting (TRT+P) condition, which was rated as strong for quality. Data  
236 were collected pre-intervention (T1) and post-intervention at 2 weeks (T2) and 12 weeks (T3).  
237 All three conditions experienced a significant reduction in PTSD intrusion symptoms measured  
238 on the CRIES-13, with the greatest reduction in the TRT+P condition, showing the lowest  
239 levels at T3. Both the TRT and TRT+P condition also experienced reductions in depression.  
240 Furthermore, all three conditions experienced a significant reduction in anxiety, however the  
241 waitlist group's scores increased by T3. It is suggested that a parenting skills component can  
242 enhance the positive effects of TRT. A pilot study by the same authors evaluating TRT in the  
243 same population in a Turkish setting was also included (29). This study was rated weak for

244 quality due to selection bias of participants and the absence of a control group. Similar findings  
245 were observed; a significant reduction was reported by participants in the Intrusion scores on  
246 the CRIES-13 at two weeks post-intervention, although other measures did not reach  
247 significance owing to low power (n=16).

248  
249 Sarkadi et al. (42) evaluated TRT in an adolescent refugee population in Sweden and found  
250 significant reductions in PTSD (CRIES-8) and depression (MADRS-S) symptoms two weeks  
251 after the intervention. Qualitative data indicated that the programme had utility through  
252 provision of social support, normalisation, valuable tools, and manageability. However, there  
253 was no reported follow up beyond two weeks; a 3-6 month follow up was planned, but  
254 measures were not reported. Barron (26) found similar results in their RCT evaluating the  
255 impact of TRT for youth with PTSD in Brazilian favelas, showing a significant reduction in  
256 PTSD and depression symptoms, and a small effect size for posttraumatic growth compared  
257 with the control group. However, there was no follow up beyond two weeks post-intervention,  
258 providing no evidence of long term impact. TRT was the most extensively studied intervention  
259 and has the strongest evidence base for reducing PTSD symptoms, although two of these  
260 studies were rated as low quality (29,49), and only one followed up beyond two weeks post-  
261 intervention (43).

262  
263 Bryant et al. (21) conducted a moderate-quality RCT evaluating a similar group-based  
264 intervention called Early Adolescent Skills for Emotions (EASE) for Syrian adolescents. The  
265 intervention spanned seven group sessions focusing on arousal reduction, behavioural  
266 activation, and problem management. Data was collected pre-intervention (T1) and post-  
267 intervention at 9 weeks (T2) and 3 months (T3). Significant reductions in the PSC-internalising  
268 scale were found compared to the control group, and this effect was sustained at T3, although

269 no significant difference were found in other variables. EASE was also evaluated by Akhtar et  
270 al. (46) in a pilot RCT, although the study was low powered and did not detect any significant  
271 changes.

272

273 Elswick et al. (30) evaluated the impact of a group after school club called the Trauma Healing  
274 Club, based on Cognitive Behavioral Interventions for Trauma in Schools (CBITS). CBITS is  
275 an evidence-based intervention deliverable by a clinician, whilst the Trauma Healing Club is  
276 suitable for non-clinicians. While significant improvement in PTSD symptoms was observed,  
277 it should be noted that this was a poor-quality study that did not report on withdrawals, the  
278 reliability and validity of measures, or potential confounders.

279

280 Li et al. (30) assessed the Power up Children's Psychological Immunity (PCPI) program, a  
281 modified group version of TF-CBT. This study was also of poor-quality and did not report on  
282 reliability and validity of measures, or potential confounders. Participants reported  
283 significantly reduced PTSD, depression, and anxiety following the intervention, but by the 3  
284 month follow up, levels were similar to pre-intervention levels.

285

286 Overall CBT-based groups had the strongest evidence base of any intervention type, with three  
287 RCTs rated strong or moderate quality providing promising evidence. However it should be  
288 noted that the remainder of studies evaluating CBT-based groups were rated weak in quality  
289 and are therefore of limited utility.

290

291 ***Other CBT-based Approaches***

292

293 Four studies explored CBT-based approaches in three distinct further contexts; one-to-one  
294 interventions (44,47), an online platform (34) and an art-based curriculum (38).

295  
296 Murray (44) conducted an evaluation of TF-CBT for children affected by HIV/AIDS in  
297 Zambia. This was a modified lay counsellor-delivered version of the intervention, which is  
298 typically administered by clinicians. The sessions involved a combination of individual  
299 sessions with the child, caregiver(s) separately, and family sessions. Lay counsellors, lacking  
300 formal qualifications in counselling or mental health, typically provide psychological support  
301 through a community setting, often with a faith-based focus. This study received a moderate  
302 quality rating, revealing significant reductions in the severity of trauma symptoms and shame  
303 symptoms when comparing pre-intervention and two weeks post-intervention scores. However,  
304 there was no long term follow up. The authors did not provide a detailed description of how  
305 TF-CBT was adapted for non-clinician delivery, but it included cultural adaptations and  
306 simplified terminology. Close weekly monitoring was provided by the trainer and a supervisor  
307 to ensure fidelity.

308  
309 Durmonev et al. (47) evaluated the impact of a peer delivered trauma-informed CBT skills  
310 curriculum among young men aged 17-24 years involved in the justice system. The  
311 intervention was delivered by ‘Paraprofessionals’ such as youth workers and volunteers in  
312 community settings, often within participants’ homes or on the street, to maximise engagement.  
313 This study was of weak quality, with a high likelihood of selection bias and unreliable or  
314 unverified data collection tools. Although there were indications of significant improvements  
315 in distress related to employment and education over time, emotion regulation did not show  
316 significant improvement.

317

318 Jaycox et al. (34) assessed an online stress and trauma curriculum called Life Improvement for  
319 Teens (LIFT), incorporating elements resembling TF-CBT and CBITS. The self-paced,  
320 internet-based curriculum was delivered online to high school students, who accessed the  
321 intervention during a weekly slot at the school site. LIFT comprised both a stress track and a  
322 trauma track, with students who reported potentially traumatic experiences being allocated to  
323 the trauma track. This study found significant improvements in PTSD symptoms and emotional  
324 problems, but observed no change in depression or anxiety. School functioning deteriorated  
325 over the course of the study. Overall, this study was rated as weak quality, as it did not specify  
326 the validity of data collection tools, and it did not discuss reasons for participant withdrawal.

327

328 Sitzler and Stockwell (36) also evaluated an art programme which incorporated aspects of  
329 CBT, which is discussed in the subsequent Art and community-based approaches section.

330

### 331 *Mindfulness*

332

333 Three studies focussed on evaluating a mindfulness intervention (22,33,37). Ito et al. (33)  
334 assessed the effects of short-term mindfulness-based group intervention delivered within a  
335 school setting for adolescents with trauma. Participants attended a single 60-minute group  
336 session and were subsequently encouraged by teachers to continue using mindfulness skills  
337 and cognitive defusion techniques. The study revealed significant improvements in mindful  
338 attention and awareness, along with reductions in depression, anxiety symptoms, and  
339 posttraumatic stress symptoms related to hyperarousal. However, these measures were  
340 recorded two weeks after the intervention, thus long term effects are unclear. This study was  
341 rated moderate quality. Schuurmans et al. (35) compared the impact of three meditation-based  
342 online games among youth in a residential care setting. Participants engaged in twelve 15-

343 minute sessions twice a week for 6 weeks. One game, called Muse, demonstrated  
344 improvements in post-traumatic symptoms, stress, and anxiety at the one month follow-up,  
345 while results for the other games were inconsistent. Although the study had a moderate overall  
346 quality rating, it featured a very small sample size, with n=15 at randomisation and n=9 at the  
347 one month follow up. Davis and Aylward (22) evaluated the impact of a trauma-informed  
348 mindful yoga intervention, which was delivered remotely to high school students. However,  
349 the study did not find significant differences in depression, anxiety, or resilience following the  
350 intervention.

351

352

### 353 *Art and community-based approaches*

354

355 Five studies evaluated interventions based on art, culture, or community, including two cohort  
356 design studies (27,38) and three qualitative studies (39–41). All studies received a weak quality  
357 rating. Sitzer and Stockwell (38) assessed a Wellness Programme delivered in schools, drawing  
358 on elements of art therapy along with aspects of CBT and Dialectical Behavioural Therapy  
359 (DBT). Results indicated significant increases in resilience and social and emotional  
360 functioning, particularly among male students. However, only unvalidated measures were used  
361 in this study. Barnett et al. (27) assessed the impact of residential culture camps on the  
362 wellbeing of Alaska Native youth aged 13 to 18 years. The results suggested a significant  
363 increase in positive affect, self esteem, and a sense of belonging. However, not all measures in  
364 this study were validated.

365

366 Harden et al. (40) examined the effects of a twice weekly after school programme involving  
367 media and theatre activities as youth-led empowerment strategies, conducted on a university

368 campus. The study identified positive themes related to empowerment, post-traumatic growth,  
369 and peace restoration among participants. Nevertheless, there were numerous methodological  
370 issues. The stated aim of the study was ‘to contribute to a narrative that would reflect the TNT  
371 project's value’, which is biased. There was no consideration of the relationship between  
372 researchers and participants, or ethical issues. These methodological weaknesses were common  
373 across all included qualitative studies.

374

375 Özden Bademci et al. (41) also evaluated a programme held on a university campus, featuring  
376 creative workshops and mentoring from volunteer university students for homeless boys aged  
377 14-17 years. Qualitative themes indicated that participants perceived the campus as a safe,  
378 engaging environment, developed trusting relationships with mentors, and increased their  
379 capacity for emotional regulation. However, similar methodological critiques applied,  
380 including a lack of consideration for the potential ethical issues arising from the mentoring  
381 relationships, and insufficient detail provided concerning the interview protocol. McMahon &  
382 Pederson (39) assessed a community-based juvenile justice diversion program and identified  
383 positive themes related to self-efficacy, empathy, connection, and conflict resolution.  
384 However, the research protocol, including how themes were reached, was not described.  
385 Overall, the evidence for art and community-based approaches found to be very weak.

386

### 387 *Other interventions*

388

389 The remaining interventions, which did not fit into thematic categories, will be summarised  
390 individually. Greenbaum & Javdani (32)<sup>2</sup> evaluated a therapeutic writing intervention called  
391 Writing and Reflecting on Identity To Empower Ourselves as Narrators (WRITE ON),  
392 delivered to juvenile justice-involved youth. The intervention consisted of 90 minute sessions



393 twice a week for six weeks. The study observed significant increases in positive mental health  
394 attributes and resilience throughout the programme and at a two week follow up. The quality  
395 was strong, although the long term impact remained unclear.

396

397 Goldbach et al. (24) conducted an RCT to assess a 10 week intervention called Proud &  
398 Empowered (P&E), which targeted SGMA and was conducted during the school day.  
399 Participation in the P&E intervention reduced minority stress and improved depression and  
400 suicidality measures, although there was no significant change in PTSD symptoms. Data was  
401 collected only one week after the intervention finished. This study received a moderate quality  
402 rating overall; validity and reliability of measures was not stated.

403

404 Taku et al. (25) examined a psychoeducational intervention about posttraumatic growth (PTG)  
405 in three conditions: a Control Group, Group 1 (intervention focused on stress-related reactions  
406 and PTG), and Group 2 (focused on negative changes and PTSD only). In Study 1, Group 1  
407 and the Control Group showed higher PTG than Group 2 after two weeks, suggesting that  
408 exposure to negative information about PTSD may suppress PTG. In Study 2, there were no  
409 differences in PTG perceptions between the groups. Findings were inconclusive for this  
410 moderate quality study.

411

412 Eruyar and Vostanis (31) evaluated the impact of group Theraplay, an attachment based  
413 intervention, with refugee children and their parents. After eight weekly sessions, a significant  
414 improvement was found in PTSD scores. However, only 59% of participants completed the  
415 programme, and reasons for withdrawals were not provided. Additionally, not all data  
416 collection tools were validated, although the PTSD measure was, which limited the quality.

417 This study was one of five studies, of varying quality, assessing interventions involving both  
418 children and caregivers, all of which suggested a positive impact (29,31,42–44).

419

420 Day et al. (28) assessed a trauma-informed intervention in a residential school, involving  
421 curriculum changes and access to relational interventions such as Theraplay to build  
422 attachment, self-esteem, and trust in others. Provision was made for two rooms to act as  
423 alternative environments for struggling students, providing access to problem solving, talk  
424 therapy, and use of sensorimotor activities. Significant differences were found in the pre and  
425 posttest scores for posttraumatic symptoms. However, the study was weak in quality given the  
426 high chance of selection bias and a lack of validated measures. Furthermore, the intervention  
427 was broadly described without specific details.

428

429 Martin and Wood (36) evaluated a group drumming intervention delivered in a school and  
430 found significant improvements for boys in terms of higher mental wellbeing and lower post-  
431 traumatic stress symptoms, but not for girls. This study was of weak quality due to selection  
432 bias and a high unexplained drop out rate.

433

## 434 **Discussion**

435

436 A systematic review methodology was used to investigate the evidence base for interventions  
437 designed to support young people affected by trauma and are suitable for delivery by non-  
438 clinicians. This is the first systematic review to comprehensively appraise interventions in this  
439 domain specifically designed for non-clinician delivery. Overall, the evidence base for trauma  
440 recovery interventions was found to be weak. Only nine out of the twenty-five studies identified  
441 were rated as strong or moderate quality, and among these, only seven reported significant

442 improvements in mental health outcomes, including depression, anxiety, or PTSD  
443 (21,26,32,33,37,43,44). Among these seven, four adopted a CBT-based approach  
444 (21,26,43,44), while two followed a mindfulness approach (33,37). The most frequently  
445 studied CBT-based intervention was TRT (26,43,49). A number of studies evaluating TRT  
446 were excluded earlier in the review process because they were administered by a clinician.  
447 While TRT itself is suitable for non-clinician delivery, some excluded studies involved  
448 clinician delivery to enhance fidelity. CBT-based groups, particularly TRT, are tentatively  
449 suggested as the interventions in this domain with the strongest evidence base.

450

451 Several of the included studies trialled interventions with refugee populations  
452 (21,29,30,43,46,49,50). This area has a growing evidence base, considering that refugees are  
453 often supported in low-resource environments such as refugee camps, where accessing  
454 specialised support can be challenging even after achieving settled status. Notably, this review  
455 excluded studies specifically measuring war- or disaster-related trauma. As a result, the studies  
456 which have been included from this context are more generalisable to a wider range of young  
457 people affected by adversity.

458

459 Six studies evaluated interventions which involved caregivers in some or all of the sessions  
460 which formed the intervention (29,43,44,46,49,50). El-Khani et al. (43) observed that TRT  
461 achieved a greater positive impact on young people's mental health and PTSD symptomology  
462 when a parenting component was included. This finding suggests a potential avenue for future  
463 research, given the intergenerational nature of ACEs and the recognised role of trusted  
464 relationships with close adults as a potential protective factor for young people exposed to  
465 ACEs (51).

466

## 467 **Implications for research**

468

469 In this domain, there is a notable scarcity of high quality studies, highlighting the need for  
470 further RCTs to assess the potential impact of interventions. CBT-based groups and  
471 mindfulness interventions appear to be promising targets for future research. Rather than  
472 relying solely on clinician-delivered designs to ensure fidelity of interventions intended for  
473 non-clinicians, more robust results can be derived from studies that implement non-clinician  
474 delivery, supplemented with measures such as observation or clinical supervision to maintain  
475 fidelity. Additionally, it is essential to incorporate longer-term follow up into study design. A  
476 majority of studies included in this review collected post-intervention data within a period of  
477 2 weeks or less. To establish the robustness of intervention evidence, longer-term follow up  
478 assessments are imperative.

479

480 In situations where conducting RCTs may not be feasible, efforts should be directed towards  
481 ensuring the reliability and validity of data collection tools. Furthermore, researchers should  
482 diligently record and follow up on withdrawals from the study. This practice is both  
483 methodologically and ethically important, as traumatised youth may disengage from  
484 therapeutic interventions if they perceive them as harmful or unsupportive. Exploring this  
485 perspective can provide valuable insights into improving intervention strategies.

486

## 487 **Implications for educational settings**

488

489 There is not a strong, definitive recommendation for schools seeking to adopt a research-  
490 informed approach within their educational setting to support young people who have  
491 experienced trauma and adversity. However, based on available evidence, the approaches

492 which are most likely to be effective at supporting young people with trauma recovery are  
493 CBT-based groups or mindfulness approaches. Additionally, interventions involving  
494 caregivers may also have value in this context. This aspect might be particularly pertinent for  
495 primary schools, which serve pupils aged under 11 years in the United Kingdom, and often  
496 maintain closer partnerships with parents and caregivers.

497

#### 498 **Review limitations**

499

500 The overall quality of this systematic review was assessed using AMSTAR 2 (52). The review  
501 meets or partially meets all checklist items on AMSTAR 2. Although the time frame for follow  
502 up was not stated in the inclusion criteria, it has been reported for all strong and moderate  
503 quality studies. The review did not examine study registries and did not seek to consult experts  
504 in the field and sources of funding for the studies included in the review have not been reported.  
505 Given the high level of anticipated and actual heterogeneity of studies in this area, a meta-  
506 analysis was not planned or conducted, which restricts the scope of the conclusions that can be  
507 drawn. Finally, the work only examined studies from the past ten years, only selected those  
508 published in English, and may have missed those published in non-academic literature. The  
509 secondary screen of the references of papers may have help to identify some of the articles  
510 missing due to the search criteria, but future work would be needed to identify interventions  
511 published in grey literature or published in languages other than English.

512

#### 513 **Conclusions**

514

515 Our review of 25 studies reveals inconsistent evidence regarding non-clinician delivered  
516 trauma informed interventions for enhancing mental health outcomes in school-age

517 individuals. There are a number of strategies with evidence that would suggest more  
518 development and rigorous evaluation would be of benefit. That is especially including an  
519 economics or cost effectiveness evaluation of those delivered online or further evaluation of  
520 the CBT-based approaches. As schools and educational institutions are increasingly expected  
521 to assume a greater role in supporting mental health of traumatised youth, the development of  
522 this evidence base, is of crucial importance.

523

#### 524 **Availability of materials:**

525

526 Data collection templates, the Covidence search results and any other materials are available  
527 upon request to [s.brophy@swansea.ac.uk](mailto:s.brophy@swansea.ac.uk).

528

#### 529 **Funding**

530

531 This research was supported by the National Centre for Population Health and Wellbeing  
532 Research. Funding was provided by Public Health Wales and the Economic and Social  
533 Research Council (ESRC) through their support of a PhD studentship.

534

#### 535 **Author Contributions**

536

537 Flo Avery led the review, was responsible for managing the project, analysing data and  
538 preparing an original draft.

539 Michaela James contributed to abstract and full text screening, quality assessment and editing.

540 Rebekah Amos contributed to abstract and full text screening, and quality assessment, editing

541 and writing.

542 Natasha Kennedy contributed to abstract and full text screening, and editing.

543 Hope Jones contributed to abstract and full text screening, and editing.

544 Sinead Brophy, Karen Hughes and Mark Bellis provided supervision and advice for the

545 systematic review and methodology, and reviewed the final report.

546

547 **Competing interests:** None to declare

548

## 549 **References**

550

- 551 1. Anda RF, Felitti VJ, Bremner JD, Walker JD, Whitfield C, Perry BD, et al. The  
552 enduring effects of abuse and related adverse experiences in childhood. *European*  
553 *Archives of Psychiatry and Clinical Neuroscience* 2005 256:3 [Internet]. 2005 Nov 29  
554 [cited 2023 Jun 16];256(3):174–86. Available from:  
555 <https://link.springer.com/article/10.1007/s00406-005-0624-4>
- 556 2. Bellis MA, Hughes K, Leckenby N, Hardcastle KA, Perkins C, Lowey H. Measuring  
557 mortality and the burden of adult disease associated with adverse childhood  
558 experiences in England: A national survey. *Journal of Public Health (United*  
559 *Kingdom)*. 2015 Sep 1;37(3):445–54.
- 560 3. Bellis MA, Ashton K, Hughes K, Ford KJ, Bishop J, Paranjothy S. Adverse childhood  
561 experiences and their impact on health-harming behaviours in the Welsh adult  
562 population. Public Health Wales NHS Trust; 2016.
- 563 4. Finkelhor D. Screening for adverse childhood experiences (ACEs): Cautions and  
564 suggestions. *Child Abuse Negl.* 2018 Nov 1;85:174–9.
- 565 5. Finkelhor D, Ormrod RK, Turner HA. Poly-victimization: A neglected component in  
566 child victimization. *Child Abuse Negl.* 2007 Jan 1;31(1):7–26.

- 567 6. Hughes K, Bellis MA, Hardcastle KA, Sethi D, Butchart A, Mikton C, et al. The effect  
568 of multiple adverse childhood experiences on health: a systematic review and meta-  
569 analysis. *Lancet Public Health*. 2017 Aug 1;2(8):e356–66.
- 570 7. Wassink-De Stigter R, Kooijmans · R, Asselman · M W, Offerman · E C P, Nelen ·  
571 W, Helmond · P. Facilitators and Barriers in the Implementation of Trauma-Informed  
572 Approaches in Schools: A Scoping Review. *School Ment Health [Internet]*. 2022 [cited  
573 2023 Jun 16];14:470–84. Available from: [https://doi.org/10.1007/s12310-021-09496-](https://doi.org/10.1007/s12310-021-09496-w)  
574 [w](https://doi.org/10.1007/s12310-021-09496-w)
- 575 8. Temkin D, Harper K, Stratford B, Sacks V, Rodriguez Y, Bartlett JD. Moving Policy  
576 Toward a Whole School, Whole Community, Whole Child Approach to Support  
577 Children Who Have Experienced Trauma. *Journal of School Health [Internet]*. 2020  
578 Dec 1 [cited 2023 Jun 21];90(12):940–7. Available from:  
579 <https://onlinelibrary.wiley.com/doi/full/10.1111/josh.12957>
- 580 9. Berger E, Martin K. Embedding trauma-informed practice within the education sector.  
581 *J Community Appl Soc Psychol [Internet]*. 2021 Mar 1 [cited 2023 Jun 21];31(2):223–  
582 7. Available from: <https://onlinelibrary.wiley.com/doi/full/10.1002/casp.2494>
- 583 10. Hoover S, Bostic J. Schools as a vital component of the child and adolescent mental  
584 health system. *Psychiatric Services [Internet]*. 2021 Jan 1 [cited 2023 Jun  
585 21];72(1):37–48. Available from:  
586 <https://ps.psychiatryonline.org/doi/10.1176/appi.ps.201900575>
- 587 11. Black PJ, Woodworth M, Tremblay M, Carpenter T. A review of trauma-informed  
588 treatment for adolescents. *Canadian Psychology*. 2012;53(3):192–203.
- 589 12. Lange BCL, Nelson A, Lang JM, Stirman SW. Adaptations of evidence-based trauma-  
590 focused interventions for children and adolescents: a systematic review.  
591 *Implementation Science Communications* 2022 3:1 [Internet]. 2022 Oct 8 [cited 2023



- 592 Feb 21];3(1):1–21. Available from:  
593 [https://implementationsciencecomms.biomedcentral.com/articles/10.1186/s43058-022-](https://implementationsciencecomms.biomedcentral.com/articles/10.1186/s43058-022-00348-5)  
594 [00348-5](https://implementationsciencecomms.biomedcentral.com/articles/10.1186/s43058-022-00348-5)
- 595 13. Marie-Mitchell A, Kostolansky R. A Systematic Review of Trials to Improve Child  
596 Outcomes Associated With Adverse Childhood Experiences. *Am J Prev Med*. 2019  
597 May 1;56(5):756–64.
- 598 14. Stratford B, Cook E, Hanneke R, Katz E, Seok D, Steed H, et al. A Scoping Review of  
599 School-Based Efforts to Support Students Who Have Experienced Trauma. *School*  
600 *Ment Health [Internet]*. 2020 Sep 1 [cited 2023 Jun 21];12(3):442–77. Available from:  
601 <https://link.springer.com/article/10.1007/s12310-020-09368-9>
- 602 15. Luthar SS, Mendes SH. Trauma-informed schools: Supporting educators as they  
603 support the children. <https://doi.org/10.1080/21683603.2020.1721385> [Internet]. 2020  
604 Apr 2 [cited 2023 Jun 21];8(2):147–57. Available from:  
605 <https://www.tandfonline.com/doi/abs/10.1080/21683603.2020.1721385>
- 606 16. Ekornes S. Teacher Perspectives on Their Role and the Challenges of Inter-  
607 professional Collaboration in Mental Health Promotion. *School Ment Health*  
608 [Internet]. 2015 Sep 10 [cited 2023 Jun 21];7(3):193–211. Available from:  
609 <https://link.springer.com/article/10.1007/s12310-015-9147-y>
- 610 17. Franklin CGS, Kim JS, Ryan TN, Kelly MS, Montgomery KL. Teacher involvement  
611 in school mental health interventions: A systematic review. *Child Youth Serv Rev*.  
612 2012 May 1;34(5):973–82.
- 613 18. Moher D, Liberati A, Tetzlaff J, Altman DG, Altman D, Antes G, et al. Preferred  
614 Reporting Items for Systematic Reviews and Meta-Analyses: The PRISMA Statement.  
615 *PLoS Med [Internet]*. 2009 Jul 1 [cited 2023 Jun 21];6(7):e1000097. Available from:  
616 <https://journals.plos.org/plosmedicine/article?id=10.1371/journal.pmed.1000097>

- 617 19. Evans, N., Lasen, M., & Tsey, K. (2015). Appendix A: Effective public health practice  
618 project (EPHPP) quality assessment tool for quantitative studies. *A systematic review*  
619 *of rural development research SpringerBriefs in Public Health*, 45-55.
- 620 20. *Critical Appraisal Skills Programme (2022). CASP) Checklist. [online] Available at:*  
621 [CASP Checklists - Critical Appraisal Skills Programme \(casp-uk.net\)](https://casp-uk.net/). Accessed:  
622 24/09/2023
- 623 21. Bryant RA, Malik A, Aqel IS, Ghatasheh M, Habashneh R, Dawson KS, et al.  
624 Effectiveness of a brief group behavioural intervention on psychological distress in  
625 young adolescent Syrian refugees: A randomised controlled trial. *PLoS Med*. 2022  
626 Aug 1;19(8).
- 627 22. Davis L, Aylward A. Mitigating Rural Adolescent Trauma: Remote Delivery of a  
628 Trauma-Informed Yoga Intervention During COVID-19. *J Child Adolesc Trauma*.  
629 2022;
- 630 23. Dumornay NM, Finegold KE, Chablani A, Elkins L, Krouch S, Baldwin M, et al.  
631 Improved emotion regulation following a trauma-informed CBT-based intervention  
632 associates with reduced risk for recidivism in justice-involved emerging adults. *Front*  
633 *Psychiatry*. 2022 Oct 5;13:951429.
- 634 24. Goldbach JT, Rhoades H, Mamey MR, Senese J, Karys P, Marsiglia FF. Reducing  
635 behavioral health symptoms by addressing minority stressors in LGBTQ adolescents: a  
636 randomized controlled trial of Proud & Empowered. *BMC Public Health*. 2021 Dec  
637 1;21(1).
- 638 25. Taku K, Cann A, Tedeschi RG, Calhoun LG. Psychoeducational Intervention Program  
639 about Posttraumatic Growth for Japanese High School Students. *J Loss Trauma*. 2017  
640 May 19;22(4):271–82.

- 641 26. Barron I, Freitas F, Bosch CA. Pilot Randomized Control Trial: Efficacy of a Group-  
642 Based Psychosocial Program for Youth with PTSD in the Brazilian Favelas. *J Child*  
643 *Adolesc Trauma* [Internet]. 2021 Sep 1 [cited 2023 Jul 20];14(3):335–45. Available  
644 from: <https://link.springer.com/article/10.1007/s40653-020-00328-8>
- 645 27. Barnett JD, Schmidt TC, Trainor B, Wexler L. A Pilot Evaluation of Culture Camps to  
646 Increase Alaska Native Youth Wellness. *Health Promot Pract*. 2020 May 1;21(3):363–  
647 71.
- 648 28. Day AG, Somers CL, Baroni BA, West SD, Sanders L, Peterson CD. Evaluation of a  
649 Trauma-Informed School Intervention with Girls in a Residential Facility School:  
650 Student Perceptions of School Environment. In: *Journal of Aggression, Maltreatment*  
651 *and Trauma*. Routledge; 2015. p. 1086–105.
- 652 29. El-Khani A, Cartwright K, Ang C, Henshaw E, Tanveer M, Calam R. Testing the  
653 feasibility of delivering and evaluating a child mental health recovery program  
654 enhanced with additional parenting sessions for families displaced by the Syrian  
655 conflict: A pilot study. *Peace and Conflict*. 2018 May 1;24(2):188–200.
- 656 30. Elswick S, Washington G, Mangrum-Apple H, Peterson C, Barnes E, Pirkey P, et al.  
657 Trauma Healing Club: Utilizing Culturally Responsive Processes in the  
658 Implementation of an After-School Group Intervention to Address Trauma Among  
659 African Refugees. *J Child Adolesc Trauma*. 2022 Mar 1;15(1):155–66.
- 660 31. Eruyar S, Vostanis P. Feasibility of group theraplay with refugee children in Turkey.  
661 *Couns Psychother Res*. 2020 Dec 1;20(4):626–37.
- 662 32. Greenbaum CA, Javdani S. Expressive writing intervention promotes resilience among  
663 juvenile justice-involved youth. *Child Youth Serv Rev*. 2017 Feb 1;73:220–9.

- 664 33. Ito D, Kubo Y, Takii A, Watanabe A, Ohtani T, Koseki S. The effects of short-term  
665 mindfulness-based group intervention utilising a school setting for Japanese  
666 adolescents with trauma. *J Psychol Couns Sch*. 2021 Dec 17;31(2):221–6.
- 667 34. Jaycox LH, Ayer L, Vona P, Hehman C, Stein BD, Mahmud A, et al. Development  
668 and preliminary evaluation of a self-guided, internet-based tool for coping with stress  
669 and trauma: Life improvement for teens (LIFT). *Psychol Serv*. 2019 Feb 1;16(1):85–  
670 94.
- 671 35. Li J, Li J, Zhang W, Wang G, Qu Z. Effectiveness of a school-based, lay counselor-  
672 delivered cognitive behavioral therapy for Chinese children with posttraumatic stress  
673 symptoms: a randomized controlled trial. *Lancet Reg Health West Pac*. 2023 Apr 1;33.
- 674 36. Martin KE, Wood LJ. Drumming to a New Beat: A Group Therapeutic Drumming and  
675 Talking Intervention to Improve Mental Health and Behaviour of Disadvantaged  
676 Adolescent Boys. *Children Australia*. 2017 Dec 1;42(4):268–76.
- 677 37. Schuurmans AAT, Nijhof KS, Scholte R, Popma A, Otten R. A novel approach to  
678 improve stress regulation among traumatized youth in residential care: Feasibility  
679 study testing three game-based meditation interventions. *Early Interv Psychiatry*. 2020  
680 Aug 1;14(4):476–85.
- 681 38. Sitzer DL, Stockwell AB. The art of wellness: A 14-week art therapy program for at-  
682 risk youth. *Arts in Psychotherapy*. 2015 Sep 1;45:69–81.
- 683 39. McMahon SM, Pederson S. “Love and compassion not found Elsewhere”: A  
684 Photovoice exploration of restorative justice and nonviolent communication in a  
685 community-based juvenile justice diversion program. *Child Youth Serv Rev*. 2020 Oct  
686 1;117.
- 687 40. Harden T, Kenemore T, Mann K, Edwards M, List C, Martinson KJ. The Truth N’  
688 Trauma Project: Addressing Community Violence Through a Youth-Led, Trauma-

- 689 Informed and Restorative Framework. *Child and Adolescent Social Work Journal*.  
690 2015 Feb 1;32(1):65–79.
- 691 41. Özden Bademci H, Figen Karadayi E, de Zulueta F. Attachment intervention through  
692 peer-based interaction: Working with Istanbul’s street boys in a university setting.  
693 *Child Youth Serv Rev*. 2015;49:20–31.
- 694 42. Sarkadi A, Ådahl K, Stenvall E, Ssegonja R, Batti H, Gavra P, et al. Teaching  
695 Recovery Techniques: evaluation of a group intervention for unaccompanied refugee  
696 minors with symptoms of PTSD in Sweden. *Eur Child Adolesc Psychiatry*. 2018 Apr  
697 1;27(4):467–79.
- 698 43. El-Khani A, Cartwright K, Maalouf W, Haar K, Zehra N, Çokamay-Yılmaz G, et al.  
699 Enhancing teaching recovery techniques (Trt) with parenting skills: Rct of trt +  
700 parenting with trauma-affected syrian refugees in lebanon utilising remote training  
701 with implications for insecure contexts and covid-19. *Int J Environ Res Public Health*.  
702 2021 Aug 2;18(16).
- 703 44. Murray LK, Familiar I, Skavenski S, Jere E, Cohen J, Imasiku M, et al. An evaluation  
704 of trauma focused cognitive behavioral therapy for children in Zambia. *Child Abuse  
705 Negl*. 2013 Dec;37(12):1175–85.
- 706 45. Dumornay NM, Finegold KE, Chablani A, Elkins L, Krouch S, Baldwin M, et al.  
707 Improved emotion regulation following a trauma-informed CBT-based intervention  
708 associates with reduced risk for recidivism in justice-involved emerging adults. *Front  
709 Psychiatry*. 2022 Oct 5;13:951429.
- 710 46. Akhtar A, Malik A, Ghatasheh M, Aqel IS, Habashneh R, Dawson KS, et al.  
711 Feasibility trial of a brief scalable psychological intervention for Syrian refugee  
712 adolescents in Jordan. <https://doi.org/10.1080/2000819820211901408> [Internet]. 2021

- 713 [cited 2023 Jul 25];12(1). Available from:  
714 <https://www.tandfonline.com/doi/abs/10.1080/20008198.2021.1901408>
- 715 47. Dumornay N, Finegold KE, Chablani A, Elkins L, Krouch S, Baldwin M, et al.  
716 Improved emotion regulation following a trauma-informed CBT-based intervention  
717 associates with reduced risk for recidivism in justice-involved emerging adults. *Front*  
718 *Psychiatry*. 2022;13.
- 719 48. Yule W, Dyregrov A, Raundalen M, Smith P. Children and war: The work of the  
720 Children and War Foundation. *Eur J Psychotraumatol* [Internet]. 2013 [cited 2023 Jul  
721 25];4(SUPPL.). Available from:  
722 <https://www.tandfonline.com/doi/abs/10.3402/ejpt.v4i0.18424>
- 723 49. Sarkadi A, Ådahl K, Stenvall E, Ssegonja R, Batti H, Gavra P, et al. Teaching  
724 Recovery Techniques: evaluation of a group intervention for unaccompanied refugee  
725 minors with symptoms of PTSD in Sweden. *Eur Child Adolesc Psychiatry* [Internet].  
726 2018 Apr 1 [cited 2022 Nov 28];27(4):467–79. Available from:  
727 <https://link.springer.com/article/10.1007/s00787-017-1093-9>
- 728 50. Eruyar S, Vostanis P. Feasibility of group theraplay with refugee children in Turkey.  
729 *Couns Psychother Res* [Internet]. 2020 Dec 1 [cited 2023 Feb 21];20(4):626–37.  
730 Available from: <https://onlinelibrary.wiley.com/doi/full/10.1002/capr.12354>
- 731 51. Crouch E, Radcliff E, Stropolis M, Srivastav A. Safe, Stable, and Nurtured:  
732 Protective Factors against Poor Physical and Mental Health Outcomes Following  
733 Exposure to Adverse Childhood Experiences (ACEs). *J Child Adolesc Trauma*  
734 [Internet]. 2019 Jun 15 [cited 2023 Jul 25];12(2):165–73. Available from:  
735 <https://link.springer.com/article/10.1007/s40653-018-0217-9>
- 736 52. Shea BJ, Reeves BC, Wells G, Thuku M, Hamel C, Moran J, et al. AMSTAR 2: a  
737 critical appraisal tool for systematic reviews that include randomised or non-

738 randomised studies of healthcare interventions, or both. BMJ [Internet]. 2017 Sep 21  
739 [cited 2023 Jul 21];358:4008. Available from:  
740 <https://www.bmj.com/content/358/bmj.j4008>  
741

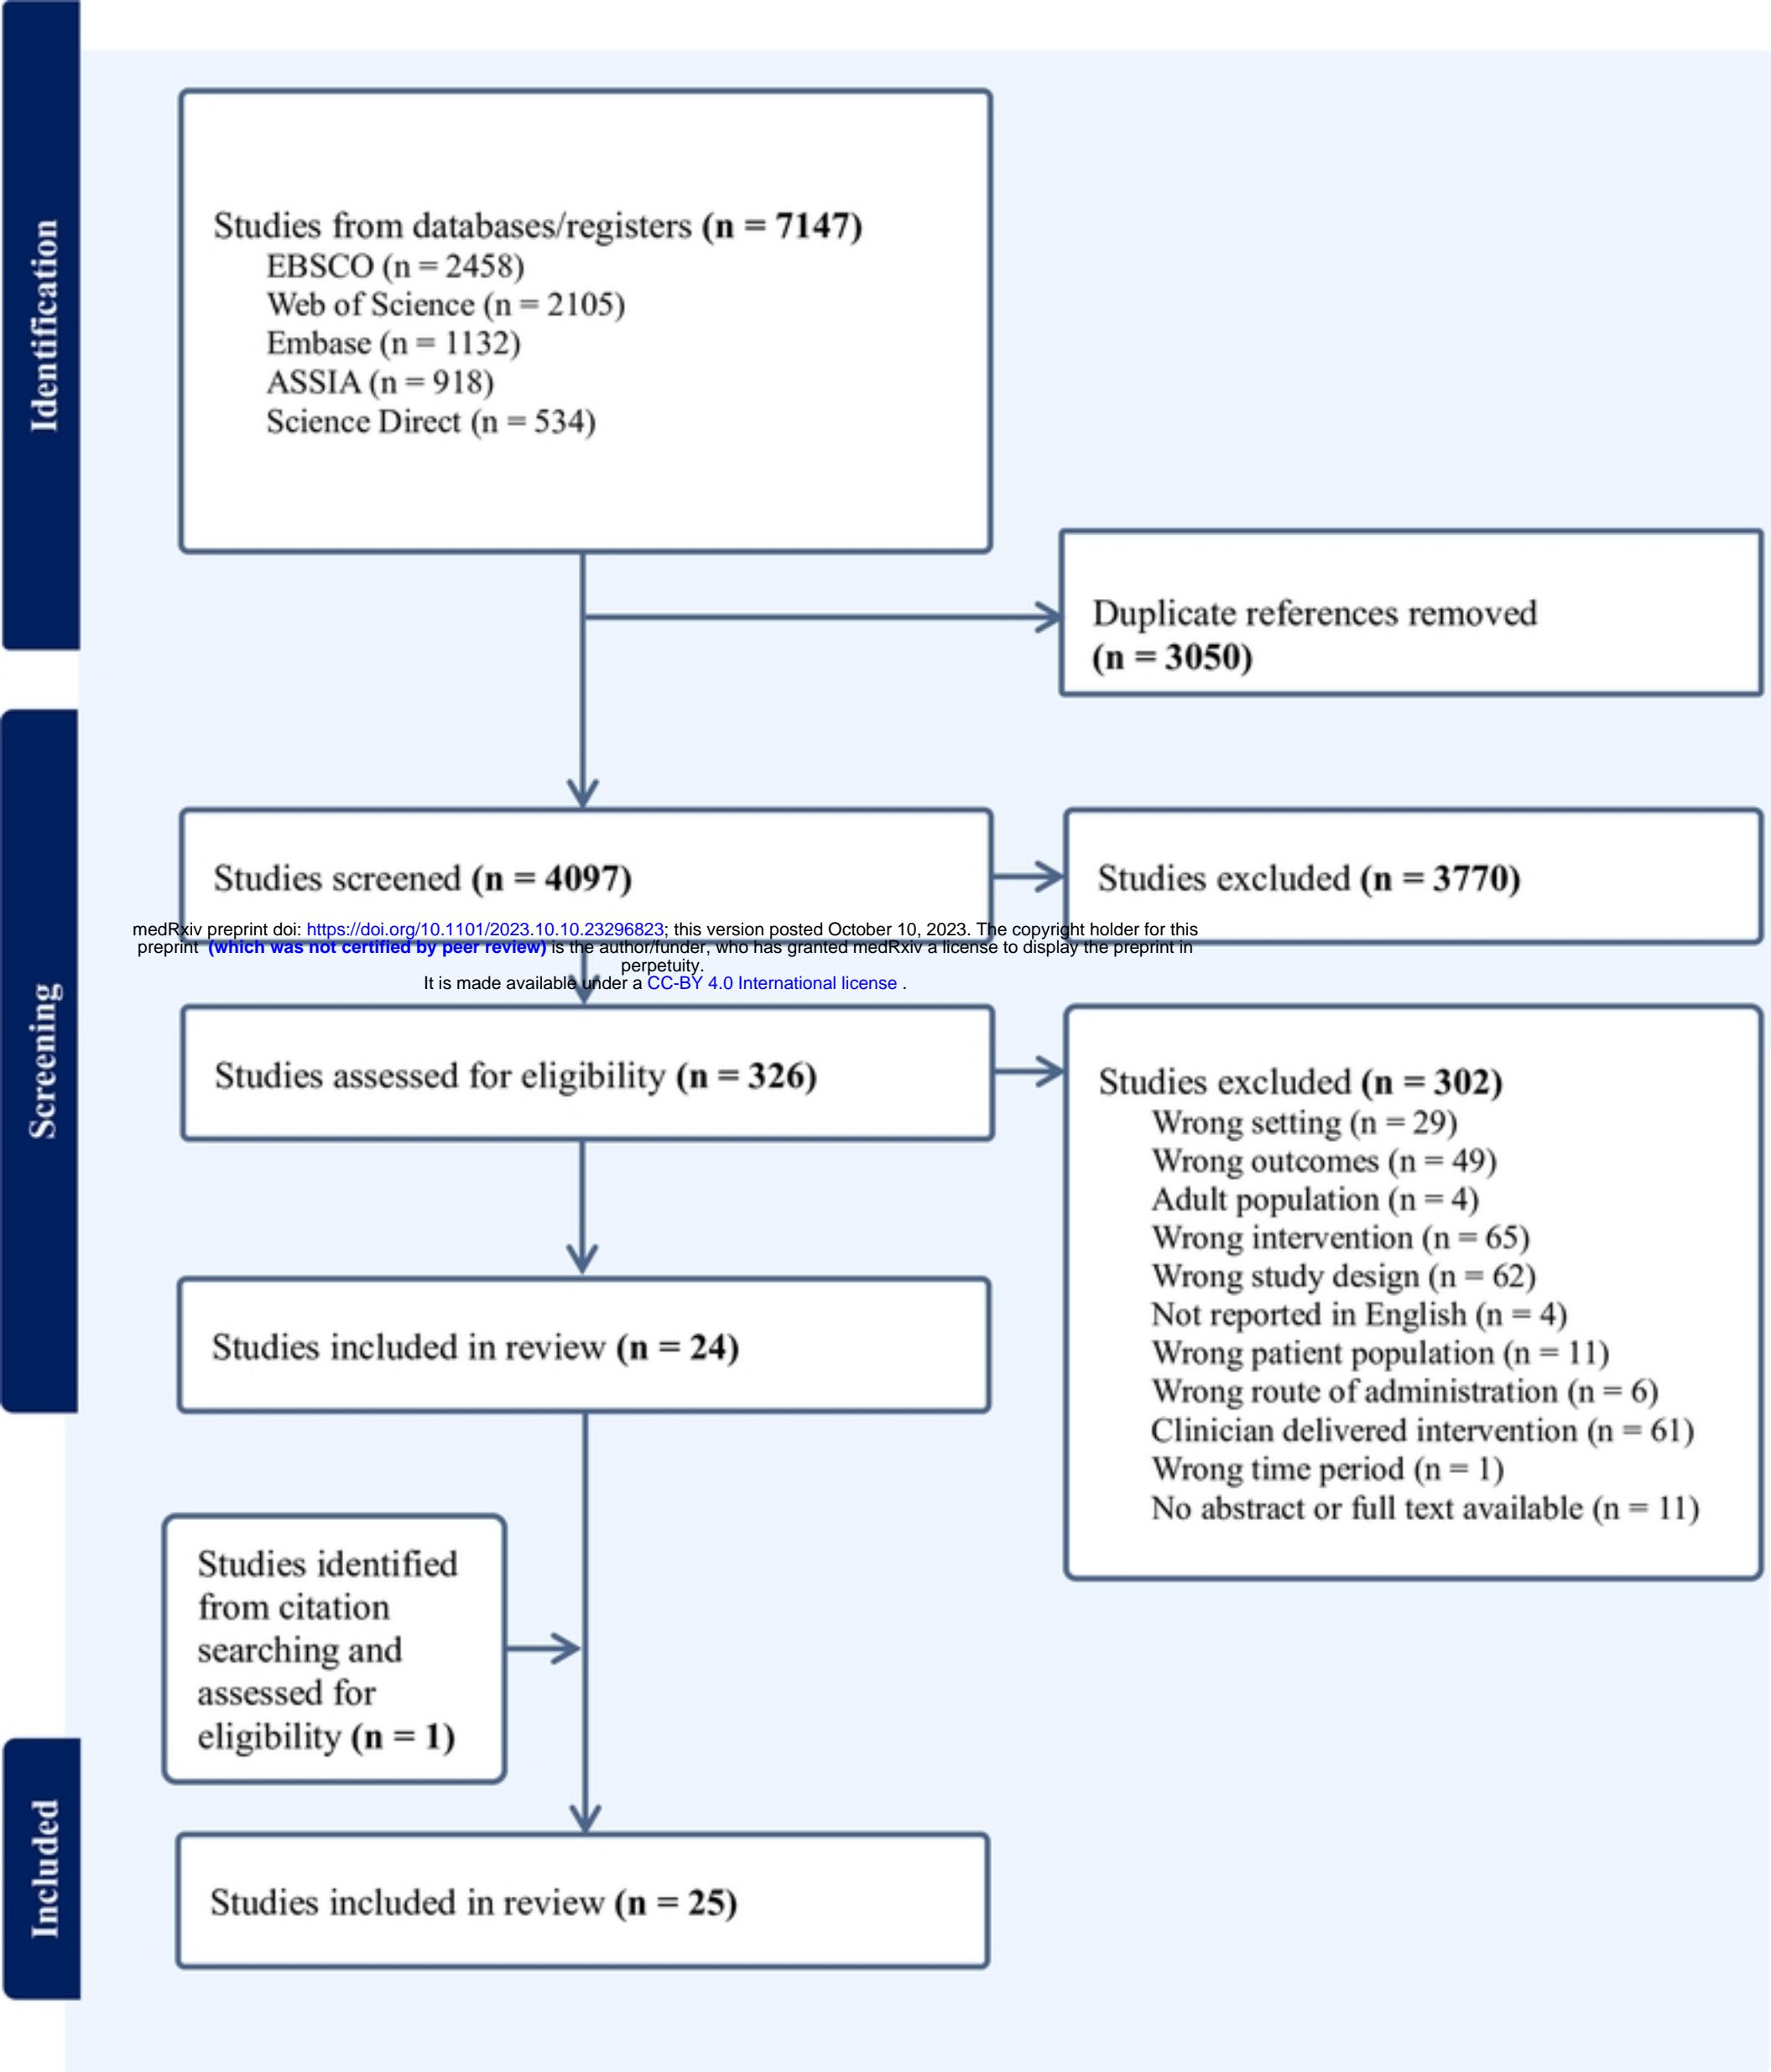

Fig 1. PRISMA diagram
